# Supplementary material for: Innovation through telemedicine to improve medication abortion access in primary health centers: findings from a pilot study in Musanze District, Rwanda
Source: Springer Nature journal article supplement (doi:10.1186/s12889-025-22629-z), 2025-05-07
Supplement: MOESM1 [file 12889_2025_22629_MOESM1_ESM.pdf]

## **Service Intake Form for Musanze District Telemedicine MA**

|                                                                                                                                                                                                                                                                                                                                                                        |                                                                             |  |
|------------------------------------------------------------------------------------------------------------------------------------------------------------------------------------------------------------------------------------------------------------------------------------------------------------------------------------------------------------------------|-----------------------------------------------------------------------------|--|
| <b>IDENTIFICATION</b>                                                                                                                                                                                                                                                                                                                                                  |                                                                             |  |
| 101. Patient ID (serial #-HC Code-Patient #-Year)<br>_____                                                                                                                                                                                                                                                                                                             | 102. Patient Name _____                                                     |  |
| 103. District _____                                                                                                                                                                                                                                                                                                                                                    |                                                                             |  |
| 104. Sector _____                                                                                                                                                                                                                                                                                                                                                      |                                                                             |  |
| 105. Cell _____                                                                                                                                                                                                                                                                                                                                                        |                                                                             |  |
| 106. Village _____                                                                                                                                                                                                                                                                                                                                                     |                                                                             |  |
| 107. Phone Number the woman would prefer to be contacted at for follow-up _____                                                                                                                                                                                                                                                                                        |                                                                             |  |
| 107a. Second phone number where woman be reached for follow-up _____                                                                                                                                                                                                                                                                                                   |                                                                             |  |
| 108. Health facility name: _____                                                                                                                                                                                                                                                                                                                                       | 109. Date the women presented at the HC (first time):<br>____ / ____ / ____ |  |
| 110. HC nurse-midwife Name: _____                                                                                                                                                                                                                                                                                                                                      |                                                                             |  |
| 111. Reasons for the visit (check all that apply) <ul style="list-style-type: none"> <li><input type="checkbox"/> TOP</li> <li><input type="checkbox"/> PAC</li> <li><input type="checkbox"/> Post-abortion contraception</li> <li><input type="checkbox"/> Treatment of side effects</li> <li><input type="checkbox"/> Abortion complications</li> </ul> Other: _____ |                                                                             |  |
| 112. Did the woman give consent to be contacted in three weeks for the client exit interview conducted by RHIYW?                                                                                                                                                                                                                                                       | <input type="checkbox"/> Yes<br><input type="checkbox"/> No                 |  |

|  |  |  |  |  |  |  |  |
|--|--|--|--|--|--|--|--|
|  |  |  |  |  |  |  |  |
|--|--|--|--|--|--|--|--|

## MEDICAL HISTORY

|                                          |                                                                                                                                                                                                                                                                                 |     |                                                                                                                                                                                                                                                                                |                                                                                                                                                                                                                                                                                                                                                                                                                                                                                                                         |                                                                                                                                                                     |
|------------------------------------------|---------------------------------------------------------------------------------------------------------------------------------------------------------------------------------------------------------------------------------------------------------------------------------|-----|--------------------------------------------------------------------------------------------------------------------------------------------------------------------------------------------------------------------------------------------------------------------------------|-------------------------------------------------------------------------------------------------------------------------------------------------------------------------------------------------------------------------------------------------------------------------------------------------------------------------------------------------------------------------------------------------------------------------------------------------------------------------------------------------------------------------|---------------------------------------------------------------------------------------------------------------------------------------------------------------------|
| 301                                      | Age <input type="text"/> <input type="text"/> Years<br>Don't know ... 88                                                                                                                                                                                                        | 302 | Education<br><input type="checkbox"/> No education<br><input type="checkbox"/> Primary<br><input type="checkbox"/> Secondary<br><input type="checkbox"/> Above secondary                                                                                                       | 303                                                                                                                                                                                                                                                                                                                                                                                                                                                                                                                     | Marital Status<br><input type="checkbox"/> Never married<br><input type="checkbox"/> Married/living together<br><input type="checkbox"/> Divorced/Widowed/Separated |
| 304                                      | Time to travel to the health facility<br><input type="text"/> <input type="text"/> Hours                                                                                                                                                                                        | 305 | Mode of transportation to health facility (Check all that apply)<br><input type="checkbox"/> Walk<br><input type="checkbox"/> Bus<br><input type="checkbox"/> Bicycle<br><input type="checkbox"/> Motorbike<br><input type="checkbox"/> Car<br><input type="checkbox"/> Other: |                                                                                                                                                                                                                                                                                                                                                                                                                                                                                                                         |                                                                                                                                                                     |
|                                          |                                                                                                                                                                                                                                                                                 | 306 | How much did you pay for transport? <input type="text"/> <input type="text"/>                                                                                                                                                                                                  |                                                                                                                                                                                                                                                                                                                                                                                                                                                                                                                         |                                                                                                                                                                     |
| <b>Gynecologic and Obstetric History</b> |                                                                                                                                                                                                                                                                                 |     |                                                                                                                                                                                                                                                                                |                                                                                                                                                                                                                                                                                                                                                                                                                                                                                                                         |                                                                                                                                                                     |
| 307                                      | Gravida <input type="text"/> <input type="text"/>                                                                                                                                                                                                                               | 308 | Parity <input type="text"/> <input type="text"/>                                                                                                                                                                                                                               | 309                                                                                                                                                                                                                                                                                                                                                                                                                                                                                                                     | Prior Abortions <input type="text"/> <input type="text"/>                                                                                                           |
|                                          |                                                                                                                                                                                                                                                                                 |     |                                                                                                                                                                                                                                                                                | 310                                                                                                                                                                                                                                                                                                                                                                                                                                                                                                                     | Last Menstrual Period<br>____/____/____                                                                                                                             |
| 311                                      | Number of alive children <input type="text"/> <input type="text"/>                                                                                                                                                                                                              |     |                                                                                                                                                                                                                                                                                |                                                                                                                                                                                                                                                                                                                                                                                                                                                                                                                         |                                                                                                                                                                     |
| 312                                      | When did the Last pregnancy before this one end (if ended in live birth, when was last child born?):<br>312a. <input type="text"/> <input type="text"/> years ago 312b. <input type="text"/> <input type="text"/> months ago                                                    |     | 313                                                                                                                                                                                                                                                                            | What was the outcome of last pregnancy before this one (follow up from question 312)?<br><input type="checkbox"/> Baby born alive<br><input type="checkbox"/> Pregnancy interfered/aborted<br><input type="checkbox"/> Miscarriage (spontaneous abortion)<br><input type="checkbox"/> Ectopic pregnancy<br><input type="checkbox"/> Baby born dead (still birth)<br><input type="checkbox"/> Other: _____                                                                                                               |                                                                                                                                                                     |
| 314                                      | Use of contraception prior to this current pregnancy:<br><br><input type="checkbox"/> Yes, regularly (always used, method failed)<br><input type="checkbox"/> Yes, but not regularly (e.g. forgot to take pills, condoms, etc)<br><input type="checkbox"/> No contraceptive use |     | 315                                                                                                                                                                                                                                                                            | What contraceptive method were you using? (Check all that apply)<br><br><input type="checkbox"/> Condoms<br><input type="checkbox"/> Pills<br><input type="checkbox"/> Injectables<br><input type="checkbox"/> Implant<br><input type="checkbox"/> IUD<br><input type="checkbox"/> Male sterilization<br><br><input type="checkbox"/> Natural family planning (Period abstinence, etc)<br><input type="checkbox"/> Breast feeding<br><input type="checkbox"/> Other traditional method<br><input type="checkbox"/> None |                                                                                                                                                                     |

ID

|  |  |  |  |  |  |  |  |
|--|--|--|--|--|--|--|--|
|  |  |  |  |  |  |  |  |
|--|--|--|--|--|--|--|--|

## PHYSICAL EXAMINATION

### VITAL SIGNS

|     |                         |                                                                                     |     |       |                                                                              |
|-----|-------------------------|-------------------------------------------------------------------------------------|-----|-------|------------------------------------------------------------------------------|
| 401 | BP                      | <input type="text"/> <input type="text"/> <input type="text"/> <input type="text"/> | 403 | Pulse | <input type="text"/> <input type="text"/> <input type="text"/> beats/ minute |
| 404 | Respirations per minute | <input type="text"/> <input type="text"/>                                           | 405 | Temp  | <input type="text"/> <input type="text"/> °C                                 |

### Pregnancy Test and Gestational Age

|     |                                         |                                                                                                                                                             |
|-----|-----------------------------------------|-------------------------------------------------------------------------------------------------------------------------------------------------------------|
| 406 | Pregnancy test result                   | <input type="checkbox"/> Not done<br><input type="checkbox"/> Positive<br><input type="checkbox"/> Negative<br><input type="checkbox"/> Inconclusive result |
| 407 | Gestational Age (estimate based on LMP) | <input type="text"/> <input type="text"/> Weeks                                                                                                             |
| 408 | Pelvic Exam _____<br>(Notes)            |                                                                                                                                                             |
| 409 | Ultrasound Exam _____<br>(Notes)        |                                                                                                                                                             |
| 410 | Gestational Age (ultrasound results)    | <input type="text"/> <input type="text"/> Weeks                                                                                                             |

|     |                                               | Yes                      | No                       | Not observed             | Comments                                                                                          |
|-----|-----------------------------------------------|--------------------------|--------------------------|--------------------------|---------------------------------------------------------------------------------------------------|
| 411 | Cervix is open                                | <input type="checkbox"/> | <input type="checkbox"/> | <input type="checkbox"/> |                                                                                                   |
| 412 | Signs of vaginal infection                    | <input type="checkbox"/> | <input type="checkbox"/> | <input type="checkbox"/> | Treatment given:                                                                                  |
| 413 | Presence of uterine bleeding                  | <input type="checkbox"/> | <input type="checkbox"/> | <input type="checkbox"/> | <input type="checkbox"/> Scant <input type="checkbox"/> Moderate <input type="checkbox"/> Profuse |
| 414 | Speculum exam results normal (if no, comment) | <input type="checkbox"/> | <input type="checkbox"/> | <input type="checkbox"/> |                                                                                                   |

### ANCILLARY TESTING

|     |                      | Yes                      | No                       | Not observed             |  |
|-----|----------------------|--------------------------|--------------------------|--------------------------|--|
| 415 | Hemoglobin           | <input type="checkbox"/> | <input type="checkbox"/> | <input type="checkbox"/> |  |
| 416 | Hematocrit/platelets | <input type="checkbox"/> | <input type="checkbox"/> | <input type="checkbox"/> |  |
| 417 | STI                  | <input type="checkbox"/> | <input type="checkbox"/> | <input type="checkbox"/> |  |
| 418 | HIV                  | <input type="checkbox"/> | <input type="checkbox"/> | <input type="checkbox"/> |  |
| 419 | Hepatitis B          | <input type="checkbox"/> | <input type="checkbox"/> | <input type="checkbox"/> |  |
| 420 | Hepatitis C          | <input type="checkbox"/> | <input type="checkbox"/> | <input type="checkbox"/> |  |
| 421 | RPR                  | <input type="checkbox"/> | <input type="checkbox"/> | <input type="checkbox"/> |  |

|  |  |  |  |  |  |  |  |
|--|--|--|--|--|--|--|--|
|  |  |  |  |  |  |  |  |
|--|--|--|--|--|--|--|--|

|      |                                                                                           |                                                                                                                                                                                                                                                                                                                                                                                                                                                                                                                                                                                                  |                          |                          |                                                                                                                                                              |
|------|-------------------------------------------------------------------------------------------|--------------------------------------------------------------------------------------------------------------------------------------------------------------------------------------------------------------------------------------------------------------------------------------------------------------------------------------------------------------------------------------------------------------------------------------------------------------------------------------------------------------------------------------------------------------------------------------------------|--------------------------|--------------------------|--------------------------------------------------------------------------------------------------------------------------------------------------------------|
| 422  | Blood group                                                                               | <input type="checkbox"/>                                                                                                                                                                                                                                                                                                                                                                                                                                                                                                                                                                         | <input type="checkbox"/> | <input type="checkbox"/> | <input type="checkbox"/> A<br><input type="checkbox"/> B<br><input type="checkbox"/> AB<br><input type="checkbox"/> O<br><input type="checkbox"/> Don't know |
| 423  | RH                                                                                        | <input type="checkbox"/>                                                                                                                                                                                                                                                                                                                                                                                                                                                                                                                                                                         | <input type="checkbox"/> | <input type="checkbox"/> | <input type="checkbox"/> Negative<br><input type="checkbox"/> Positive<br><input type="checkbox"/> Don't know                                                |
| 424  | Other tests                                                                               |                                                                                                                                                                                                                                                                                                                                                                                                                                                                                                                                                                                                  |                          |                          |                                                                                                                                                              |
| 425  | Did you see any signs of maltreatment/abuse, risk behaviors or poor mental health status? | <input type="checkbox"/> Yes<br><input type="checkbox"/> No → Skip to next section                                                                                                                                                                                                                                                                                                                                                                                                                                                                                                               |                          |                          |                                                                                                                                                              |
| 426  | If yes, mark all the apply                                                                | <input type="checkbox"/> Mental illness<br><input type="checkbox"/> Signs of extreme anxiety<br><input type="checkbox"/> Uncooperative<br><input type="checkbox"/> Homelessness<br><input type="checkbox"/> Signs of physical abuse → 426a<br><input type="checkbox"/> Signs of sexual abuse → 426a<br><input type="checkbox"/> Family rejection<br><input type="checkbox"/> Domestic violence → 426a<br><input type="checkbox"/> Illicit drug use<br><input type="checkbox"/> Alcoholism<br><input type="checkbox"/> Clinical depress/attempted suicide<br><input type="checkbox"/> Other _____ |                          |                          |                                                                                                                                                              |
| 426a | Did you refer to GBV services?                                                            | <input type="checkbox"/> Yes<br><input type="checkbox"/> No                                                                                                                                                                                                                                                                                                                                                                                                                                                                                                                                      |                          |                          |                                                                                                                                                              |

|  |  |  |  |  |  |  |  |
|--|--|--|--|--|--|--|--|
|  |  |  |  |  |  |  |  |
|--|--|--|--|--|--|--|--|

| <b>TELEMEDICINE CONSULTATION</b> |                                                                    |                                                                                                                                                                                                                                                                                                                                                                                                                                                                                                                                                                                                                                                                                     |
|----------------------------------|--------------------------------------------------------------------|-------------------------------------------------------------------------------------------------------------------------------------------------------------------------------------------------------------------------------------------------------------------------------------------------------------------------------------------------------------------------------------------------------------------------------------------------------------------------------------------------------------------------------------------------------------------------------------------------------------------------------------------------------------------------------------|
| 501                              | Telemedicine visit number                                          | <input type="checkbox"/> 1<br><input type="checkbox"/> 2<br><input type="checkbox"/> 3<br><input type="checkbox"/> 4<br><input type="checkbox"/> 5<br><input type="checkbox"/> 6                                                                                                                                                                                                                                                                                                                                                                                                                                                                                                    |
| 501a                             | Date and time of telemedicine visit                                | Date: __/__/____<br>Time: _____                                                                                                                                                                                                                                                                                                                                                                                                                                                                                                                                                                                                                                                     |
| 502                              | Reason(s) for telemedicine consultation                            | <input type="checkbox"/> First consultation for TOP<br><input type="checkbox"/> Immediate follow up consultation<br><input type="checkbox"/> Management MA of sides effects<br><input type="checkbox"/> Management of complications<br><input type="checkbox"/> Uncertainty regarding patient care                                                                                                                                                                                                                                                                                                                                                                                  |
| 503                              | Conclusion from telemedicine consultation (check all that apply)   | <input type="checkbox"/> Woman is pregnant<br><input type="checkbox"/> Woman is eligible for TOP at the HC using MA.<br><input type="checkbox"/> Woman is referred for TOP at the district hospital<br><input type="checkbox"/> Woman prefers services at district hospital<br><input type="checkbox"/> Woman prefers surgical abortion; referred to hospital<br><input type="checkbox"/> Suspected ectopic pregnancy or abnormal intrauterine pregnancy<br><input type="checkbox"/> Woman referred to the hospital for further investigation<br><input type="checkbox"/> Uterine anomalies identified<br><input type="checkbox"/> Other:                                           |
| 504                              | Conclusion from additional teleconsultations (check all the apply) | <input type="checkbox"/> Reviewed additional exams<br><input type="checkbox"/> Prescribed treatment for complications<br><input type="checkbox"/> Prescribed additional treatment related to other illnesses<br><input type="checkbox"/> Decision to refer<br><input type="checkbox"/> Patient wants service at hospital<br><input type="checkbox"/> Patient wants surgical abortion<br><input type="checkbox"/> Other                                                                                                                                                                                                                                                              |
| 505                              | Comments and notes from clinical examinations: _____<br>_____      |                                                                                                                                                                                                                                                                                                                                                                                                                                                                                                                                                                                                                                                                                     |
| 506                              | Post TOP counseling given (check all that apply)                   | <input type="checkbox"/> Woman told what she should expect: Bleeding similar to a menstrual period, which may continue up to two (2) weeks, and spotting until the next menstrual period.<br><input type="checkbox"/> Woman was informed of possible side effects: pain/cramping; chills/fever; nausea/vomiting; diarrhea.<br><input type="checkbox"/> Woman was informed about danger signs to look for after being discharged (heavy bleeding, sign of infection & feeling very sick) and when to contact a medical provider immediately.<br><input type="checkbox"/> Woman was advised to come or call immediately (and not to wait) if she has complications or signs of danger |

ID

|  |  |  |  |  |  |  |  |
|--|--|--|--|--|--|--|--|
|  |  |  |  |  |  |  |  |
|--|--|--|--|--|--|--|--|

|  |  |                                                                                                                                                                                                                                                                                                                                                                                                                                                                                                                                                                            |
|--|--|----------------------------------------------------------------------------------------------------------------------------------------------------------------------------------------------------------------------------------------------------------------------------------------------------------------------------------------------------------------------------------------------------------------------------------------------------------------------------------------------------------------------------------------------------------------------------|
|  |  | <ul style="list-style-type: none"><li><input type="checkbox"/> Contraceptive counseling was given for all methods.</li><li><input type="checkbox"/> Instructions for taking medications, routine hygiene and resuming sexual activity were given.</li><li><input type="checkbox"/> Risk behaviors were described</li><li><input type="checkbox"/> Phone number for provider was given</li><li><input type="checkbox"/> Obtained woman's phone number and appointment for follow up</li><li><input type="checkbox"/> Obtained woman's consent for follow up calls</li></ul> |
|--|--|----------------------------------------------------------------------------------------------------------------------------------------------------------------------------------------------------------------------------------------------------------------------------------------------------------------------------------------------------------------------------------------------------------------------------------------------------------------------------------------------------------------------------------------------------------------------------|

|  |  |  |  |  |  |  |  |
|--|--|--|--|--|--|--|--|
|  |  |  |  |  |  |  |  |
|--|--|--|--|--|--|--|--|

## MEDICATION AND TREATMENT

|       |                                                                                                                                   |                                                             |                                                                                                                                                                                                                         |
|-------|-----------------------------------------------------------------------------------------------------------------------------------|-------------------------------------------------------------|-------------------------------------------------------------------------------------------------------------------------------------------------------------------------------------------------------------------------|
| 601   | Treatment given<br><input type="checkbox"/> Termination of pregnancy<br><input type="checkbox"/> Treatment of incomplete abortion | 602                                                         | Treatment Method<br><input type="checkbox"/> Misoprostol only<br><input type="checkbox"/> Mifepristone & Misoprostol<br><input type="checkbox"/> MVA<br><input type="checkbox"/> D&C<br><input type="checkbox"/> Other: |
| 603   | Were there any complications due to the procedure or medication?                                                                  | <input type="checkbox"/> Yes<br><input type="checkbox"/> No |                                                                                                                                                                                                                         |
| 603a. | Is yes, specify                                                                                                                   |                                                             |                                                                                                                                                                                                                         |

### Medication administered during treatment

Complete the following section for each of the medications used for treatment of the patient. It includes anesthetics used for MVA; misoprostol; mifepristone; painkillers; anti-emetics, etc.

| Drug<br>(write name of drug including IV fluids and blood)                      | A. Dose<br>(mg/ mcg/ IU/ mL) | B. Route of Administration | C. Date Taken | D. Timing                    | E. Location Taken |
|---------------------------------------------------------------------------------|------------------------------|----------------------------|---------------|------------------------------|-------------------|
| Name                                                                            |                              |                            |               |                              |                   |
| 604. Mifepristone                                                               | 200 mg                       | Oral                       |               | Record time take at HC       | Health Center     |
| 605. Misoprostol (1st dose)                                                     | 800 mcg                      | Buccal/cheek               |               | 24 hours after mifepristone  |                   |
| 606. Misoprostol (2nd dose)                                                     | 800 mcg                      | Buccal/cheek               |               | 3 hours after 1 dose of miso |                   |
| 607. Misoprostol (3rd dose) – only administered after telemedicine consultation | 800 mcg                      | Buccal/cheek               |               | As needed                    |                   |
| 608. Paracetamol                                                                | 500 mg                       | Oral                       |               | Every 4 hours as needed      |                   |
| 609.                                                                            |                              |                            |               |                              |                   |
| 610.                                                                            |                              |                            |               |                              |                   |
| 611.                                                                            |                              |                            |               |                              |                   |

|  |  |  |  |  |  |  |  |
|--|--|--|--|--|--|--|--|
|  |  |  |  |  |  |  |  |
|--|--|--|--|--|--|--|--|

| CONTRACEPTIVE COUNSELING & PROVISION |                                            |                                                                                                                                                                                                                                                                                                                                                                                                    |
|--------------------------------------|--------------------------------------------|----------------------------------------------------------------------------------------------------------------------------------------------------------------------------------------------------------------------------------------------------------------------------------------------------------------------------------------------------------------------------------------------------|
| 612                                  | Counseled patient on contraceptive methods | <input type="checkbox"/> Yes<br><input type="checkbox"/> No                                                                                                                                                                                                                                                                                                                                        |
| 613                                  | Contraceptive method provided:             | <input type="checkbox"/> OCP<br><input type="checkbox"/> Condoms<br><input type="checkbox"/> IUD<br><input type="checkbox"/> Injectables<br><input type="checkbox"/> Implant<br><input type="checkbox"/> Female sterilization<br><input type="checkbox"/> Male sterilization<br><input type="checkbox"/> Natural family planning methods<br><input type="checkbox"/> Referred for preferred method |
| 614                                  | Date contraceptive method provided         | ____/____/____                                                                                                                                                                                                                                                                                                                                                                                     |
| 615                                  | Condition of patient at discharge          | <input type="checkbox"/> Well<br><input type="checkbox"/> Awake, alert/walks unassisted<br><input type="checkbox"/> She agrees she is ready to leave<br><input type="checkbox"/> Normal vital signs<br><input type="checkbox"/> Referred to other facility                                                                                                                                         |
| 616                                  | Date & time of discharge                   | Date: ____/____/____<br>Time: _____                                                                                                                                                                                                                                                                                                                                                                |
| 617                                  | Comments                                   |                                                                                                                                                                                                                                                                                                                                                                                                    |
| 618                                  | Treatment Done by:                         | _____<br>(Name of nurse/midwife)                                                                                                                                                                                                                                                                                                                                                                   |
| 619                                  | Medical doctor/gynecologist                | _____                                                                                                                                                                                                                                                                                                                                                                                              |

|  |  |  |  |  |  |  |  |
|--|--|--|--|--|--|--|--|
|  |  |  |  |  |  |  |  |
|--|--|--|--|--|--|--|--|

## FOLLOW-UP VISITS OR CALLS

|      |                                                    |                                                                                                                                                                                                                                                                                 |                                                      |
|------|----------------------------------------------------|---------------------------------------------------------------------------------------------------------------------------------------------------------------------------------------------------------------------------------------------------------------------------------|------------------------------------------------------|
| 701  | Date of initial visit<br>____/____/____ (DD/MM/YY) | 702                                                                                                                                                                                                                                                                             | Date of follow-up Visit<br>____/____/____ (DD/MM/YY) |
| 703  | Modality used for follow up                        | <input type="checkbox"/> Physical follow up visit<br><input type="checkbox"/> Phone call                                                                                                                                                                                        |                                                      |
| 704  | Select which follow-up call/visit:                 | <input type="checkbox"/> 48 hours<br><input type="checkbox"/> 7 days →705<br><input type="checkbox"/> 14 days →705<br><input type="checkbox"/> Additional follow-up →705                                                                                                        |                                                      |
| 704a | 48 hour follow-up (Select all that apply)          | <input type="checkbox"/> Patient took misoprostol properly<br><input type="checkbox"/> Patient started to bleed<br><input type="checkbox"/> Patient managing side effects well<br><input type="checkbox"/> Patient told to come back to HC<br>(Specify) _____<br>_____<br>_____ |                                                      |

### Assessment

|      |                                 |                                                                                                                                 |                          |                          |                                                                |
|------|---------------------------------|---------------------------------------------------------------------------------------------------------------------------------|--------------------------|--------------------------|----------------------------------------------------------------|
| 705  | BP                              | <input type="text"/> <input type="text"/> <input type="text"/> / <input type="text"/> <input type="text"/> <input type="text"/> | 708                      | Pulse (beats per minute) | <input type="text"/> <input type="text"/> <input type="text"/> |
| 707  | Respirations per minute         | <input type="text"/> <input type="text"/>                                                                                       | 709                      | Temp                     | <input type="text"/> <input type="text"/> °C                   |
|      |                                 | Yes                                                                                                                             | No                       | Not observed             | Comments                                                       |
| 710a | Sepsis/infection suspected      | <input type="checkbox"/>                                                                                                        | <input type="checkbox"/> | <input type="checkbox"/> |                                                                |
| 710b | Shock/heavy breathing suspected | <input type="checkbox"/>                                                                                                        | <input type="checkbox"/> | <input type="checkbox"/> |                                                                |
| 710c | Uterine perforation suspected   | <input type="checkbox"/>                                                                                                        | <input type="checkbox"/> | <input type="checkbox"/> |                                                                |

### Pelvic Exam & Pregnancy Test

|     |                       |                                           |                                   |                                   |                                              |
|-----|-----------------------|-------------------------------------------|-----------------------------------|-----------------------------------|----------------------------------------------|
| 711 | Pregnancy test result | <input type="checkbox"/> Not done         | <input type="checkbox"/> Positive | <input type="checkbox"/> Negative | <input type="checkbox"/> Inconclusive result |
| 712 | Size of the uterus    | <input type="text"/> <input type="text"/> |                                   |                                   |                                              |
| 713 | Gestational age       | <input type="text"/> <input type="text"/> |                                   |                                   |                                              |
| 714 | Pelvic Exam Comments  |                                           |                                   |                                   |                                              |

|  |  |  |  |  |  |  |  |
|--|--|--|--|--|--|--|--|
|  |  |  |  |  |  |  |  |
|--|--|--|--|--|--|--|--|

|                                  |                                                                                                                                                                                                                                                                                                                                                                                                                                                                                                                |                          |                                                                                                                                                                                                             |                          |                                                                                                   |
|----------------------------------|----------------------------------------------------------------------------------------------------------------------------------------------------------------------------------------------------------------------------------------------------------------------------------------------------------------------------------------------------------------------------------------------------------------------------------------------------------------------------------------------------------------|--------------------------|-------------------------------------------------------------------------------------------------------------------------------------------------------------------------------------------------------------|--------------------------|---------------------------------------------------------------------------------------------------|
|                                  |                                                                                                                                                                                                                                                                                                                                                                                                                                                                                                                |                          |                                                                                                                                                                                                             |                          |                                                                                                   |
| 715                              | Ultrasound Exam Notes<br><hr/>                                                                                                                                                                                                                                                                                                                                                                                                                                                                                 |                          |                                                                                                                                                                                                             |                          |                                                                                                   |
|                                  |                                                                                                                                                                                                                                                                                                                                                                                                                                                                                                                | Yes<br>(1)               | No<br>(2)                                                                                                                                                                                                   | Not observed<br>(99)     | Comments (96)                                                                                     |
| 716                              | Cervical is open                                                                                                                                                                                                                                                                                                                                                                                                                                                                                               | <input type="checkbox"/> | <input type="checkbox"/>                                                                                                                                                                                    | <input type="checkbox"/> |                                                                                                   |
| 717                              | Signs of vaginal infection                                                                                                                                                                                                                                                                                                                                                                                                                                                                                     | <input type="checkbox"/> | <input type="checkbox"/>                                                                                                                                                                                    | <input type="checkbox"/> | Treatment given:                                                                                  |
| 718                              | Presence of uterine bleeding                                                                                                                                                                                                                                                                                                                                                                                                                                                                                   | <input type="checkbox"/> | <input type="checkbox"/>                                                                                                                                                                                    | <input type="checkbox"/> | <input type="checkbox"/> Scant <input type="checkbox"/> Moderate <input type="checkbox"/> Profuse |
| 719                              | Speculum exam results normal (if no, comment)                                                                                                                                                                                                                                                                                                                                                                                                                                                                  | <input type="checkbox"/> | <input type="checkbox"/>                                                                                                                                                                                    | <input type="checkbox"/> |                                                                                                   |
| 720                              | Result of first procedure:<br><input type="checkbox"/> Termination in progress/continuing<br><input type="checkbox"/> Treatment success - complete abortion<br><input type="checkbox"/> Treatment success - completion of incomplete abortion<br><input type="checkbox"/> Lost to follow-up<br><input type="checkbox"/> Treatment failure - Incomplete abortion<br><input type="checkbox"/> Treatment failure - Continuation of pregnancy<br><input type="checkbox"/> Treatment failure - Death of the patient |                          |                                                                                                                                                                                                             |                          |                                                                                                   |
|                                  |                                                                                                                                                                                                                                                                                                                                                                                                                                                                                                                |                          |                                                                                                                                                                                                             |                          |                                                                                                   |
| <b>Follow-up Treatment Given</b> |                                                                                                                                                                                                                                                                                                                                                                                                                                                                                                                |                          |                                                                                                                                                                                                             |                          |                                                                                                   |
| 722                              | Treatment given<br><input type="checkbox"/> Secondary treatment of incomplete abortion<br><input type="checkbox"/> Secondary treatment of continued pregnancy<br><input type="checkbox"/> Referral to another facility<br><input type="checkbox"/> None – In course<br><input type="checkbox"/> None - successful<br>Other:                                                                                                                                                                                    |                          |                                                                                                                                                                                                             |                          |                                                                                                   |
| 723                              | Treatment Method:<br><input type="checkbox"/> Misoprostol alone<br><input type="checkbox"/> Mifepristone & misoprostol<br><input type="checkbox"/> MVA<br><input type="checkbox"/> D&C<br><input type="checkbox"/> Other _____<br><input type="checkbox"/> None                                                                                                                                                                                                                                                | 724                      | Treatment given at<br><input type="checkbox"/> Same facility as initial visit<br><input type="checkbox"/> Another facility (Part of study)<br><input type="checkbox"/> Another facility (not part of study) |                          |                                                                                                   |

|  |  |  |  |  |  |  |  |
|--|--|--|--|--|--|--|--|
|  |  |  |  |  |  |  |  |
|--|--|--|--|--|--|--|--|

| Symptoms and management during/after treatment<br>(questions to be asked patients in all follow-up visits 7 days and 14 days in person or by phone)                                                                                                                                                                                                                                                                             |                                                                          |                                                                                                                                                                                                                                                          |                                                                 |                                                                                                |                                           |
|---------------------------------------------------------------------------------------------------------------------------------------------------------------------------------------------------------------------------------------------------------------------------------------------------------------------------------------------------------------------------------------------------------------------------------|--------------------------------------------------------------------------|----------------------------------------------------------------------------------------------------------------------------------------------------------------------------------------------------------------------------------------------------------|-----------------------------------------------------------------|------------------------------------------------------------------------------------------------|-------------------------------------------|
| <i>I am going to read you a list of side effects that may be related to the treatment you have received at the health facility. Can you please tell me if you had any of these side effects after you went home from the health facility (after receiving the treatment). I will also ask you to rate their severity from 1 to 5, if you have experienced some side effects, and some questions about how you managed them:</i> |                                                                          |                                                                                                                                                                                                                                                          |                                                                 |                                                                                                |                                           |
| Symptoms                                                                                                                                                                                                                                                                                                                                                                                                                        | A. What was the severity on a scale of 1 to 5?                           | B. Did patient take any medication?                                                                                                                                                                                                                      | C. Did patient see a health care provider for this side effect? | D. How long did it last approximately?                                                         | E. Do patient still have the side effect? |
| 725. Nausea                                                                                                                                                                                                                                                                                                                                                                                                                     | <input type="checkbox"/> <input type="checkbox"/><br>Did not have ... 99 | YES ... 1<br>NO ... 2                                                                                                                                                                                                                                    | YES ... 1<br>(specify)<br>NO ... 2                              | <input type="checkbox"/> <30<br><input type="checkbox"/> 30-60<br><input type="checkbox"/> >60 | YES ... 1<br>NO ... 2                     |
| 726. Vomiting                                                                                                                                                                                                                                                                                                                                                                                                                   | <input type="checkbox"/> <input type="checkbox"/><br>Did not have ... 99 | YES ... 1<br>NO ... 2                                                                                                                                                                                                                                    | YES ... 1<br>NO ... 2                                           | <input type="checkbox"/> <30<br><input type="checkbox"/> 30-6<br><input type="checkbox"/> >60  | YES ... 1<br>NO ... 2                     |
| 727. Headache                                                                                                                                                                                                                                                                                                                                                                                                                   | <input type="checkbox"/> <input type="checkbox"/><br>Did not have ... 99 | YES ... 1<br>NO ... 2                                                                                                                                                                                                                                    | YES ... 1<br>NO ... 2                                           | <input type="checkbox"/> <30<br><input type="checkbox"/> 30-6<br><input type="checkbox"/> >60  | YES ... 1<br>NO ... 2                     |
| 728. Shivering                                                                                                                                                                                                                                                                                                                                                                                                                  | <input type="checkbox"/> <input type="checkbox"/><br>Did not have ... 99 | YES ... 1<br>NO ... 2                                                                                                                                                                                                                                    | YES ... 1<br>NO ... 2                                           | <input type="checkbox"/> <30<br><input type="checkbox"/> 30-6<br><input type="checkbox"/> >60  | YES ... 1<br>NO ... 2                     |
| 729. Vaginal bleeding                                                                                                                                                                                                                                                                                                                                                                                                           | <input type="checkbox"/> <input type="checkbox"/><br>Did not have ... 99 | YES ... 1<br>NO ... 2                                                                                                                                                                                                                                    | YES ... 1<br>NO ... 2                                           | <input type="checkbox"/> <30<br><input type="checkbox"/> 30-6<br><input type="checkbox"/> >60  | YES ... 1<br>NO ... 2                     |
| 730. Abdominal pain                                                                                                                                                                                                                                                                                                                                                                                                             | <input type="checkbox"/> <input type="checkbox"/><br>Did not have ... 99 | YES ... 1<br>NO ... 2                                                                                                                                                                                                                                    | YES ... 1<br>NO ... 2                                           | <input type="checkbox"/> <30<br><input type="checkbox"/> 30-6<br><input type="checkbox"/> >60  | YES ... 1<br>NO ... 2                     |
| 731. Other (specify)<br>_____                                                                                                                                                                                                                                                                                                                                                                                                   | <input type="checkbox"/> <input type="checkbox"/><br>Did not have ... 99 | YES ... 1<br>NO ... 2                                                                                                                                                                                                                                    | YES ... 1<br>NO ... 2                                           | <input type="checkbox"/> <30<br><input type="checkbox"/> 30-6<br><input type="checkbox"/> >60  | YES ... 1<br>NO ... 2                     |
| 732. For a physical follow up consultation:                                                                                                                                                                                                                                                                                                                                                                                     |                                                                          | <input type="checkbox"/> Minimal or absent bleeding<br><input type="checkbox"/> Normal uterine size (small, firm)<br><input type="checkbox"/> Uterus and adnexa not tender and no cervical motion tenderness<br><input type="checkbox"/> Closed cervical |                                                                 |                                                                                                |                                           |
| 733. Note on psychosocial status:                                                                                                                                                                                                                                                                                                                                                                                               |                                                                          | <input type="checkbox"/> Report doing well /recovered<br><input type="checkbox"/> Good Emotional Status<br><input type="checkbox"/> Domestic Violence<br><input type="checkbox"/> Potential anxiety<br>Specify Other Psychological concerns _____        |                                                                 |                                                                                                |                                           |

|  |  |  |  |  |  |  |  |
|--|--|--|--|--|--|--|--|
|  |  |  |  |  |  |  |  |
|--|--|--|--|--|--|--|--|

734.

## CONCLUSION FOR FOLLOW UP – CONSULTATION

- ☐ She is doing well/ no danger sign/stay home.
  - Menstrual-like bleeding and cramping
- ☐ Incomplete evacuation/treatment failure/ woman should come back at health center
  - Bleeding more than normal menses
- ☐ Present of PAC complications / woman should come back at health center
- ☐ Woman should comeback at the health center for other reasons: specify: \_\_\_\_\_
- ☐ Woman referred to hospital. Specify reasons; \_\_\_\_\_
- ☐ Other conclusion specify: \_\_\_\_\_

|  |  |  |  |  |  |  |  |
|--|--|--|--|--|--|--|--|
|  |  |  |  |  |  |  |  |
|--|--|--|--|--|--|--|--|

## TREATMENT SUMMARY

201. Venue of TOP

- ☐ District Hospital  
☐ This Health Center  
☐ Other \_\_\_\_\_

202. Date and Time of Doctor  
telemedicine consultation

Date: \_\_\_\_/\_\_\_\_/\_\_\_\_

Time: \_\_\_\_\_

203. RRH Doctor Name: \_\_\_\_\_

204. Signature \_\_\_\_\_

\_\_\_\_/\_\_\_\_/\_\_\_\_  
205. Date of initial visit  
(when MA combi pack given)

\_\_\_\_/\_\_\_\_/\_\_\_\_  
206. Follow-up call #1  
(48 initial visit)

\_\_\_\_/\_\_\_\_/\_\_\_\_  
207. Follow-up call #2  
(7 days later)

\_\_\_\_/\_\_\_\_/\_\_\_\_  
208. Follow-up call #3  
(14 days later)

209. Conclusion of 1<sup>st</sup> tele consultation  
(Check all that apply)

- ☐ MA Authorized  
☐ Referred to hospital  
☐ Contraceptive method adopted first visit  
☐ Need to return for contraceptive method  
☐ Other \_\_\_\_\_

210. Treatment prescribed:

- ☐ Misoprostol only  
☐ Mifepristone +  
                   Misoprostol  
☐ Other: \_\_\_\_\_

211. Modality agreed upon with  
woman for 1<sup>st</sup> follow-up call/visit:

- ☐ Cell phone  
☐ Physical consultation

212. Outcome for the 1<sup>st</sup> follow up consultation (7 days):

- ☐ Woman doing well; no danger sign, woman told to stay home.  
☐ Treatment failed  
☐ Woman told to come back at the health center for physical examination  
☐ Woman referred to hospital. Specify reasons: \_\_\_\_\_  
☐ Other outcome: \_\_\_\_\_

213. Outcome for 2<sup>nd</sup> follow up consultation (14 days):

- ☐ Treatment successful  
☐ Treatment failed  
☐ Woman told to come back to the health center for physical examination  
☐ Woman referred to hospital  
       Reasons: \_\_\_\_\_  
☐ Other: \_\_\_\_\_

214. Condition of patient at discharge

- ☐ Well  
☐ Referred to other facility
